# Supplementary material
Source: publisher site journal article supplement (https://www.dovepress.com/article/231075)
Supplement: Supplementary file 1 [file get_supplementary_file.php]

**Appendix 1**

**CVDRAM Training Program Outline**

| **Introduction: Addressing the need for community-based CVD risk assessment** |
| --- |
| ***Workshop #1, title: “Introduction to cardiovascular risk assessment and management”*** – 3 hours |
| Topics that are covered in the workshop:   - Overview of primary prevention of coronary heart disease and stroke - Estimation of cardiovascular risk in individuals without known CVD - Overview of the risk equivalents and established risk factors for CVD   Learning objectives are:   - Recognize the burden of CVD in Qatar and globally. - Understand the risk factors associated with the development of CVD. - Recognize and differentiate primary versus secondary prevention of CVD. - Understand the importance of assessing the cardiovascular risk in individuals without known CVD. - Estimate the cardiovascular risk status of a given person using validated CVD risk equations and similar tools. - Discuss opportunities in community pharmacy practice to address the cardiovascular health needs of people living in Qatar. |
| ***Workshop #2, title: “Implementation of CVD risk assessment and management services”***- 3 hours |
| Topics that are covered in the workshop:   - Physical assessment skills necessary for screening individuals for CVD risk, including blood pressure, waist and height measurements to estimate body mass index, and capillary blood collection for measuring blood cholesterol and glucose using point-of-care instruments. - Use of CVD risk prediction tools for estimating cardiovascular risk using and interpreting the results of physical assessments.   Learning Objectives are:   - Describe assessment tools that can be used to screen individuals for the presence of cardiovascular risk factors. - Understand the physical assessments that are required for estimating an individual’s cardiovascular risk. - Perform and interpret findings of assessments required for estimating an individual’s cardiovascular risk, including:   - weight, height and waist circumference measurements   - blood pressure measurement   - fingerstick sampling for testing blood cholesterol and glucose - Document results resulting from relevant history taking and from physical assessments to estimate absolute cardiovascular risk. - Communicate findings of CVD risk assessments to facilitate efficient and effective clinical encounters. |
| **Management of CVD risk: Addressing the knowledge gap in CVD risk factors** |
| ***Learning Module#1: “Management of Dyslipidemia”***  ***Duration of the lecture:*** 20 minutes  ***Time for completing other module learning activities and resources:*** 2 hours |
| Learning Objectives:   - Recognize the relation between lipids and cardiovascular risk - Describe lipid transport and metabolism - List the classification of dyslipidemia - State the secondary causes of dyslipidemia - Describe what is considered as optimal cholesterol levels - Identify the benefits of cholesterol reduction and overall goal of intervention - Identify the Four Statin Benefit Groups in CVD primary prevention - Be able to provide recommendations for patients with and without clinical atherosclerotic cardiovascular disease (ASCVD) - Select non-pharmacological and pharmacological therapies that modify lipids - Formulate a monitoring plan and duration of treatment for managing dyslipidemia |
| ***Learning Module 2: “Management of Hypertension”***  ***Duration of the lecture:*** 48 minutes  ***Time for completing other module learning activities and resources:*** 2 hours |
| Learning Objectives:   - Define and classify hypertension - Recognize the pathophysiology of hypertension - State the risk factors for hypertension - Describe the screening and diagnostic tests for identifying patients with Hypertension. - Identify the effects of lifestyle modifications on BP - Demonstrate appropriate drug selection and blood pressure goals for the treatment of hypertension according to the presence of concomitant conditions. |
| ***Learning Module#3: “Glycemic control and vascular complications in type 2 diabetes”***  ***Duration of lecture:*** 1 hour  ***Time for completing other module learning activities and resources:*** 2 hours |
| Learning Objectives:   - Recognize type of diabetes and its pathophysiology - Discuss the epidemiology of diabetes - Explain how diabetes is diagnosed - Identity the goals of Diabetes management - Select non-pharmacological therapies that modify diabetes - List the major pharmacotherapeutic classes of antidiabetics for type 2 diabetes - Discuss the major characteristics of each class and its place in therapy according to latest guidelines. - Recognize the Major recommendations for patients with diabetes who are at risk of CVD |
| ***Learning module#4: “Weight and obesity management”***  ***Duration of lecture:*** 22 minutes  ***Time for completing other module learning activities and resources:*** 2 hours |
| Learning Objectives:   - Define obesity and recognize how it is classified - Identify what causes obesity - State the benefits of managing weight in relation to CVD - Be able to initiate a conversation about body weight with patients who are overweight or obese - Make appropriate recommendations to patient for managing their weight - Monitor patients who are on weight-reduction treatment |
| ***Learning Module#5: “Smoking cessation”***  ***Duration of lecture:*** 33 minutes  ***Time for completing other module learning activities and resources:*** 2 hours |
| Learning Objectives:   - Identify the risks associated with smoking and its the effect on CVD - Summarize the cardiovascular benefits of smoking cessation - Identify the Five "A's" for assessing tobacco use and addressing smoking cessation. - Recognize the five stages to smoking cessation - Summarize the medications available for smoking cessation - Formulate a medication therapy plan to manage a patient who wishes to stop smoking. - Counsel and support patients throughout a smoking cessation attempt |

**Appendix 2**

**Pre – Questionnaire**

Dear participant,

Thank you very much for agreeing to take part of this training program. Completion of the survey is an indication that you have read the information on this project and that you agree to be a participant of this phase of the study. Please be reassured that this survey is anonymous (no one will be able to identify you) and confidential (results will not be shared with any external parties).

Please ensure to complete the survey to the best of your ability and as completely as possible. The results of this survey will allow us to understand the overall knowledge of the participants in regards to cardiovascular risk assessment and management, and for the development of future training programs that can address any knowledge gaps and needs of pharmacists for the provision of enhanced services within their communities.

**SECTION 1: Multiple Choice Questions**

**Based on the latest American College of Chest Physicians/American Heart Association (ACC/AHA) guidelines (Circulation. 2014;129[suppl 2]:S1-S45)**

**Q1: In adults 40–79 years of age who are free from atherosclerotic cardiovascular disease (ASCVD), it is reasonable to estimate 10-year ASCVD risk every:**

1. Year
2. 4–6 years
3. 10 years
4. No need to estimate cardiovascular risk for those who are free of CVD

**Q2: Which of the following is a general characteristic of the 2013 ACC/AHA guidelines that is different than previous guidelines?**

Rather than rely on randomized data, they rely on expert consensus alone.

They recommend a single statin intensity across all ASCVD risk categories.

They abandon lipid targets.

They do not recommend different target cholesterol levels for diabetics.

**Q3: The following are validated tools for estimating an individual’s risk for developing clinically evident CVD, EXCEPT:**

1. ACC/AHA Pooled Cohort Equations
2. QRISK
3. Framingham Risk Score
4. QKidney

**Q4: Which of the following measures is needed for estimating CVD risk:**

1. Coronary artery calcium levels
2. Family history of coronary heart disease
3. Blood pressure reading
4. High-sensitivity C-reactive protein (CRP) levels

**Q5: All of the following conditions should be recorded when assessing CVD risk, EXCEPT:**

1. Renal impairment (eGFR<60)
2. Genetic lipid disorder
3. Asthma
4. Atrial fibrillation

**Q6: Men at age of 40 and women at age of 50 should be offered CVD risk assessment if they have the following medical history, EXCEPT:**

Prior blood pressure (BP) ≥160/95 mm Hg

eGFR>60 ml/min/1.73 m

History of gestational diabetes

Being a smoker

**Q7: Which of the following statements is INCORRECT in regards to the use of antiplatelet therapy in primary prevention of CVD:**

Antiplatelet agents should not be added if the patient is already on anticoagulants.

Harms and benefits should be taken into account when prescribing Aspirin® for patients without established CVD.

Uncontrolled blood pressure is a major bleeding risk

Aspirin® should only be prescribed for high CVD-risk individuals with a low risk of bleeding

**Q8: Which of the following individuals are NOT suitable for starting HMG-CoA reductase inhibitors (statin) therapy for primary prevention of CVD:**

1. Individuals with diabetes mellitus, at age of 40–75 years, with LDL-C of 70–189 mg/dL (1.8 – 4.8 mmol/L)
2. Individuals without diabetes mellitus at age of 40–75 years, with LDL-C of 70–189 mg/dL (1.8 – 4.8 mmol/L) and estimated ASCVD risk ≥ 7.5%
3. Individuals with LDL-C ≥ 190 mg/dL (≥ 4.9 mmol/L) without secondary cause hyperlipidemia
4. Smokers, at age of 40-75 years, with an LDL-C < 70 mg/dL (< 1.8 mmol/L)

**Q9: Which of the following statin regimens is defined as high-intensity by the ACC/AHA guidelines?**

Rosuvastatin 20 mg daily

Atorvastatin 20 mg daily

Simavastatin 40 mg daily

Pravastatin 40 mg daily

**Q10: Which of the following statements is INCORRECT in regards to obesity management for patients at risk of developing CVD:**

1. Sustained weight loss of more than 5% produce clinically meaningful reductions in triglycerides, blood glucose, blood pressure, hemoglobin A1c and improvements LDL–C and HDL–C.
2. Adults with CV risk factors and BMI of (25.0-29.9 kg/m2) are good candidates for Bariatric surgery.
3. Obese patients with CV risk factors should be encouraged to undertake lifestyle intervention programs before the initiation of pharmacotherapies for obesity reduction.
4. It is unnecessary to measure waist circumference in patients with BMI ≥35 kg/m2 because the waist circumference will likely be elevated and will add no additional risk information.

**Based on the following case, please answer Q11 - Q13:**

Jane is a white 54-year-old woman with a sedentary lifestyle who smokes (more than 10 cigarettes per day), but does not have diabetes or known CVD. Her blood pressure is 136/82 mmHg, total cholesterol level is 200 mg/dL (5.2 mmol/L), HDL-C level is 41 mg/dL (1.1 mmol/L) and a BMI of 29 kg/m2. Both of Jane’s parents had premature CHD. She takes pantoprazole for GERD and suffers from constipation (she regularly uses a laxative), and on-and-off hemorrhoids. She does not have any other significant medical history.

**Q11: Which of the following CVD risk reduction strategies is the MOST suitable for Jane?**

Low intensity statin, considering Jane’s parents had premature CHD.

Aspirin® considering she is on pantoprazole which will decrease any risk of bleeding.

Smoking cessation strategy, such as nicotine replacement therapy.

No recommendations needed at this time as her CVD risk is low.

**Q12: Which of the following lifestyle management strategies are NOT suitable for Jane?**

1. Consume no more than 2400 mg of sodium/day would maintain her blood pressure controlled.
2. Engage in a minimum of 30 minutes of moderate-intensity physical activity at least 3-4 times per week.
3. Initiate pharmacotherapy for weight loss of more than 5% as this is likely to produce a clinically meaningful reduction in her lipid profile and her blood pressure.
4. Encourage a healthy diet: Avoid or rarely include butter, deep-fried and fatty foods; and only occasionally choose sweet bakery products or pastries.

**Q13: What other measurements and follow-up plan is recommended for Jane?**

1. Measure Jane’s waist circumference as this will provide additional risk information to implement suitable management strategies.

After 4 weeks of lifestyle management, repeat her lipid profile (non-fasting) to recalculate risk.

The initial target of her lifestyle management is to achieve a 50% reduction in LDL-C in the next 10 years.

1. Measure high-sensitivity C-reactive protein (CRP) levels as this will provide additional risk information.

SECTION 2: False/ True Questions

**Q14: High-intensity statin therapy generally results in an average LDL-C reduction of ≥50% from the untreated baseline.**

- 1. True
  2. False

**Q15: Sex and race/ethnicity are important risk factors for estimating the 10-year risk of a first CV event in CVD-free populations:**

a. True

b. False

**Q16: Dietary Approaches to Stop Hypertension diet (aka DASH diet) is one of the recommended patterns that helps in reducing blood pressure and lipids.**

1. True
2. False

**Q17: In the routine prevention of ASCVD, non-statin therapies provide similar risk-reduction benefits compared to statin therapy.**

1. True
2. False

**Q18: β-blockers do not reduce CV events to the extent that has been proven with thiazide-type diuretics, ACE inhibitors, ARBs, CCBs, or thiazide diuretics**

1. True
2. False

**Q19: Women with polycystic ovary syndrome at age of 45 years are not candidates for CVD risk assessment.**

1. True
2. False

**Q20: It is irrelevant to estimate the risk of CVD in a patient at age of 33 who has a low HDL-C level of < 27 mg/dL (0.7 mmol/L)**

1. True
2. False

**THANK YOU FOR COMPLETING THE QUESTIONNAIRE**

**Appendix 3**

**Post – Questionnaire**

Dear participant,

Thank you very much for agreeing to take part of this training program. Completion of the survey is an indication that you have read the information on this project and that you agree to be a participant of this phase of the study. Please be reassured that this survey is anonymous (no one will be able to identify you) and confidential (results will not be shared with any external parties).

Please ensure to complete the survey to the best of your ability and as completely as possible. The results of this survey will allow us to understand the overall knowledge of the participants in regards to cardiovascular risk assessment and management, and for the development of future training programs that can address any knowledge gaps and needs of pharmacists for the provision of enhanced services within their communities.

**SECTION 1a: Multiple Choice Questions**

**Based on the latest American College of Chest Physicians/American Heart Association (ACC/AHA) guidelines (Circulation. 2014;129[suppl 2]:S1-S45)**

**Q1: In adults 40–79 years of age who are free from atherosclerotic cardiovascular disease (ASCVD), it is reasonable to estimate 10-year ASCVD risk every:**

1. Year
2. 4–6 years
3. 10 years
4. No need to estimate cardiovascular risk for those who are free of CVD

**Q2: Which of the following is a general characteristic of the 2013 ACC/AHA guidelines that is different than previous guidelines?**

Rather than rely on randomized data, they rely on expert consensus alone.

They recommend a single statin intensity across all ASCVD risk categories.

They abandon lipid targets.

They do not recommend different target cholesterol levels for diabetics.

**Q3: The following are validated tools for estimating an individual’s risk for developing clinically evident CVD, EXCEPT:**

1. ACC/AHA Pooled Cohort Equations
2. QRISK
3. Framingham Risk Score
4. QKidney

**Q4: Which of the following measures is needed for estimating CVD risk:**

1. Coronary artery calcium levels
2. Family history of coronary heart disease
3. Blood pressure reading
4. High-sensitivity C-reactive protein (CRP) levels

**Q5: All of the following conditions should be recorded when assessing CVD risk, EXCEPT:**

1. Renal impairment (eGFR<60)
2. Genetic lipid disorder
3. Asthma
4. Atrial fibrillation

**Q6: Men at age of 40 and women at age of 50 should be offered CVD risk assessment if they have the following medical history, EXCEPT:**

Prior blood pressure (BP) ≥160/95 mm Hg

eGFR>60 ml/min/1.73 m

History of gestational diabetes

Being a smoker

**Q7: Which of the following statements is INCORRECT in regards to the use of antiplatelet therapy in primary prevention of CVD:**

Antiplatelet agents should not be added if the patient is already on anticoagulants.

Harms and benefits should be taken into account when prescribing Aspirin® for patients without established CVD.

Uncontrolled blood pressure is a major bleeding risk

Aspirin® should only be prescribed for high CVD-risk individuals with a low risk of bleeding

**Q8: Which of the following individuals are NOT suitable for starting HMG-CoA reductase inhibitors (statin) therapy for primary prevention of CVD:**

1. Individuals with diabetes mellitus, at age of 40–75 years, with LDL-C of 70–189 mg/dL (1.8 – 4.8 mmol/L)
2. Individuals without diabetes mellitus at age of 40–75 years, with LDL-C of 70–189 mg/dL (1.8 – 4.8 mmol/L) and estimated ASCVD risk ≥ 7.5%
3. Individuals with LDL-C ≥ 190 mg/dL (≥ 4.9 mmol/L) without secondary cause hyperlipidemia
4. Smokers, at age of 40-75 years, with an LDL-C < 70 mg/dL (< 1.8 mmol/L)

**Q9: Which of the following statin regimens is defined as high-intensity by the ACC/AHA guidelines?**

Rosuvastatin 20 mg daily

Atorvastatin 20 mg daily

Simavastatin 40 mg daily

Pravastatin 40 mg daily

**Q10: Which of the following statements is INCORRECT in regards to obesity management for patients at risk of developing CVD:**

1. Sustained weight loss of more than 5% produce clinically meaningful reductions in triglycerides, blood glucose, blood pressure, hemoglobin A1c and improvements LDL–C and HDL–C.
2. Adults with CV risk factors and BMI of (25.0-29.9 kg/m2) are good candidates for Bariatric surgery.
3. Obese patients with CV risk factors should be encouraged to undertake lifestyle intervention programs before the initiation of pharmacotherapies for obesity reduction.
4. It is unnecessary to measure waist circumference in patients with BMI ≥35 kg/m2 because the waist circumference will likely be elevated and will add no additional risk information.

**Based on the following case, please answer Q11 - Q13:**

Jane is a white 54-year-old woman with a sedentary lifestyle who smokes (more than 10 cigarettes per day), but does not have diabetes or known CVD. Her blood pressure is 136/82 mmHg, total cholesterol level is 200 mg/dL (5.2 mmol/L), HDL-C level is 41 mg/dL (1.1 mmol/L) and a BMI of 29 kg/m2. Both of Jane’s parents had premature CHD. She takes pantoprazole for GERD and suffers from constipation (she regularly uses a laxative), and on-and-off hemorrhoids. She does not have any other significant medical history.

**Q11: Which of the following CVD risk reduction strategies is the MOST suitable for Jane?**

Low intensity statin, considering Jane’s parents had premature CHD.

Aspirin® considering she is on pantoprazole which will decrease any risk of bleeding.

Smoking cessation strategy, such as nicotine replacement therapy.

No recommendations needed at this time as her CVD risk is low.

**Q12: Which of the following lifestyle management strategies are NOT suitable for Jane?**

1. Consume no more than 2400 mg of sodium/day would maintain her blood pressure controlled.
2. Engage in a minimum of 30 minutes of moderate-intensity physical activity at least 3-4 times per week.
3. Initiate pharmacotherapy for weight loss of more than 5% as this is likely to produce a clinically meaningful reduction in her lipid profile and her blood pressure.
4. Encourage a healthy diet: Avoid or rarely include butter, deep-fried and fatty foods; and only occasionally choose sweet bakery products or pastries.

**Q13: What other measurements and follow-up plan is recommended for Jane?**

1. Measure Jane’s waist circumference as this will provide additional risk information to implement suitable management strategies.

After 4 weeks of lifestyle management, repeat her lipid profile (non-fasting) to recalculate risk.

The initial target of her lifestyle management is to achieve a 50% reduction in LDL-C in the next 10 years.

1. Measure high-sensitivity C-reactive protein (CRP) levels as this will provide additional risk information.

**SECTION 1b: False / True Questions**

**Q14: High-intensity statin therapy generally results in an average LDL-C reduction of ≥50% from the untreated baseline.**

- 1. True
  2. False

**Q15: Sex and race/ethnicity are important risk factors for estimating the 10-year risk of a first CV event in CVD-free populations:**

a. True

b. False

**Q16: Dietary Approaches to Stop Hypertension diet (aka DASH diet) is one of the recommended patterns that helps in reducing blood pressure and lipids.**

1. True
2. False

**Q17: In the routine prevention of ASCVD, non-statin therapies provide similar risk-reduction benefits compared to statin therapy.**

1. True
2. False

**Q18: β-blockers do not reduce CV events to the extent that has been proven with thiazide-type diuretics, ACE inhibitors, ARBs, CCBs, or thiazide diuretics**

1. True
2. False

**Q19: Women with polycystic ovary syndrome at age of 45 years are not candidates for CVD risk assessment.**

1. True
2. False

**Q20: It is irrelevant to estimate the risk of CVD in a patient at age of 33 who has a low HDL-C level of < 27 mg/dL (0.7 mmol/L)**

1. True
2. False

**THANK YOU FOR COMPLETING THE SURVEY**

**Please proceed to the next page to evaluate the educational program**

**SECTION 2: Pharmacists’ satisfactions and perceived effectiveness on CVD risk assessment and management educational program**

**Part 1:**

Please indicate your level of agreement with the following statements in regards to your perceived effectiveness of the educational program

| **Statements** | **Definitely yes** | **Some** | **Not sure** | **Not quite** | **Definitely not** |
| --- | --- | --- | --- | --- | --- |
| Objectives of the training program were clearly defined and met |  |  |  |  |  |
| Content of the training were relevant to my practice |  |  |  |  |  |
| The training content was organized and easy to follow |  |  |  |  |  |
| On-line content was easy to use |  |  |  |  |  |
| On-line content was understandable |  |  |  |  |  |
| Time allocated for the training program was realistic and sufficient |  |  |  |  |  |
| The educational program improved my knowledge about CVD prevention strategies |  |  |  |  |  |
| Hands-on training at the professional skills laboratory improved my skills |  |  |  |  |  |
| Lecturers are knowledgeable on CVD risk assessment and management |  |  |  |  |  |
| Lecturers communicated information clearly |  |  |  |  |  |
| The educational program has motivated me to participate in Phase 3 of the study |  |  |  |  |  |

| **Statement** | **Very Satisfied** | **Satisfied** | **Neutral** | **Dissatisfied** | **Very dissatisfied** |
| --- | --- | --- | --- | --- | --- |
| Rate your overall level of satisfaction with the educational program |  |  |  |  |  |

**Part 2:**

How would you apply the content of the training program to your practice?

Please tell us how you plan to use what you learned in this training program?

If the information presented is not applicable to your local context, please tell us how we can improve this for the future?

**Appendix 4**

**OSCE checklist**

**Case: CVD Risk Assessment Score: (___%)**

**Station 1**

| **Participant Name** |  | **Assessor Name**  **SP** |  | | |
| --- | --- | --- | --- | --- | --- |
| **Physical examinations** | | |  | | |
| Rx measure height appropriately | | | 0 | 0.5 | 1 |
| Rx measure weight appropriately | | | 0 | 0.5 | 1 |
| BMI calculation | | | 0 | 0.5 | 1 |
| Obesity grading (Overweight, Grade 1, 2 ... etc) | | | 0 | 0.5 | 1 |
| Rx measure BP appropriately | | | | | |
| - Subject positioning | | | 0 | 0.5 | 1 |
| - Cuff application | | | 0 | 0.5 | 1 |
| BP interpretation (normal, pre-hypertension, hypertension) | | | 0 | 0.5 | 1 |
| Notes: | | | | | |
| **Total Score Checklist part 1: /7** | | | | | |

**Appendix 5**

**OSCE - CVD Risk Assessment**

**SP/Rx Interaction Checklist**

**Station 2:** **Score: (___%)**

| **Engagement: Developing Rapport** | | | |
| --- | --- | --- | --- |
| Introduces self as pharmacist and greets the patient | 0 |  | 1 |
| Offers to spend some time with the SP | 0 |  | 1 |
| Asks if consulted/met a general practitioner or a doctor | 0 | 0.5 | 1 |
| **CVD Risk Assessment: Gathering Information** | | | |
| Asks if SP has taken Metformin before | 0 |  | 1 |
| Asks about any medication allergies | 0 |  | 1 |
| Asks about family history of CVD or diabetes | 0 | 0.5 | 1 |
| Asks about lifestyle in general, and specifically: | 0 | 0.5 | 1 |
| Age | 0 |  | 1 |
| Weight (and height for calculating BMI? [ Y / N ]) | 0 |  | 1 |
| Physical activity | 0 |  | 1 |
| Alcohol use | 0 |  | 1 |
| Dietary patterns/habits | 0 |  | 1 |
| Asks about smoking status, amount of cigarettes/day | 0 | 0.5 | 1 |
| Asks about medical conditions in general, and specifically | 0 | 0.5 | 1 |
| Hypertension history AND/OR blood pressure readings | 0 | 0.5 | 1 |
| Diabetes history AND/OR blood sugar readings | 0 | 0.5 | 1 |
| Dyslipidemia history AND/OR lipid profile | 0 | 0.5 | 1 |
| Asks about Rx, OTC, NHPs | 0 | 0.5 | 1 |
| Performs CVD risk calculation | 0 | 0.5 | 1 |
| **CVD Risk Management: Recommendations and Patient Education** | | | |
| Counsels patient about CVD risk category | 0 |  | 1 |
| Advises about the need for statin therapy | 0 |  | 1 |
| Provides recommendation about Metformin use in weight management | 0 |  | 1 |
| Counsels on weight management and diet | 0 |  | 1 |
| Provides advice in regards to physical activity | 0 |  | 1 |
| Provides information on available smoking cessation therapies and resources | 0 |  | 1 |
| Offers a follow up visit to discuss a quitting plan OR refers to smoking cessation program elsewhere | 0 |  | 1 |
| Suggests following up with a doctor regarding statin treatment | 0 |  | 1 |
| **Engagement: Communication** | | | |
| Asks if SP has any questions | 0 |  | 1 |
| Speaks clearly | 0 |  | 1 |
| Non-judgmental / empathetic | 0 |  | 1 |
| Good eye contact | 0 |  | 1 |
| **Score for Engagement ( / 7)**  **Score for Assessment ( /16)**  **Score for Management ( /8)** | | | |
| **Total Score Checklist Part 1: /31** | | | |
| **Feedback Notes:** | | | |
